# Supplementary material for: Bioremediation of Polycyclic Aromatic Hydrocarbons in Contaminated Soils Using Vermicompost
Source: Hindawi journal article supplement (doi:10.1155/2022/5294170), 2022-01-01
Supplement: f1 [file 5294170.f1.docx]

Supplementary file

**Bioremediation of polycyclic aromatic hydrocarbons in contaminated soils using vermicompost**

FIGURE S1. Removal efficiency of PHE (%) at 2% (a), 4%, (b) 6% (c) vermicompost

FIGURE S2.Removal efficiency of PYR (%) at 2% (a), 4%, (b) 6% (c) vermicompost
